# Supplementary material for: Characterization of Circulating T Cell Receptor Repertoire Provides Information about Clinical Outcome after PD-1 Blockade in Advanced Non-Small Cell Lung Cancer Patients
Source: Cancers (Basel). 2021 Jun 12;13(12):2950. doi: 10.3390/cancers13122950 (PMC8231221; doi:10.3390/cancers13122950)
Supplement: Supplementary file 1 [file cancers-13-02950-s001.zip › Supplementary tables.xlsx]

## Sheet: Table S1
Table S1. Detailed clinicopathological characteristics of the patients included in the study.
Patient ID	Age	Sex	Smoking status	Pack-years	Histologic subtype	Stage prior to immunotherapy	Tumor size (cm)	Number of metastatic localizations	PD-L1 TPSa	First-line treatment	RECIST response at ~6 months	Durable clinical benefit (DCB)	Progression-free survival (months)	Overall survival (months)
P1	59	Male	Smoker	41	Adenocarcinoma	IVA	5	1	90	Pembrolizumab	Progressive Disease	Non-DCB	1.77 ᶧ	21.67
P2	64	Male	Smoker	66	Adenocarcinoma	IVA	1.3	1	80	Pembrolizumab	Partial Response	DCB	20	20
P3	63	Male	Smoker	42	Adenocarcinoma	IVA	2.4	1	60	Pembrolizumab	Partial Response	DCB	20.57	20.57
P4	69	Male	Smoker	20	Adenocarcinoma	IVA	4.2	1	90	Pembrolizumab	Progressive Disease	Non-DCB	2.67 ᶧ	20.57
P5	61	Male	Smoker	48	Adenocarcinoma	IVA	5.1	1	70	Pembrolizumab	Stable Disease	DCB	20.83	20.83
P6	84	Female	Never smoker	0	Poorly differentiated	IVA	3.1	1	80	Pembrolizumab	Stable Disease	DCB	20.7	20.7
P7	73	Male	Smoker	112	Adenocarcinoma	IVA	6	3	100	Pembrolizumab	Stable Disease	DCB	6.67 ᶧ	12.7 ᶧ
P8	63	Male	Smoker	135	Adenocarcinoma	IVA	5.4	2	70	Pembrolizumab	Progressive Disease	Non-DCB	2.8 ᶧ	5.87 ᶧ
P9	65	Female	Smoker	80	Adenocarcinoma	IVB	4.6	6	70	Pembrolizumab	Partial Response	DCB	18.47	18.47
P10	55	Male	Smoker	41	Adenocarcinoma	IVA	6.8	8	100	Pembrolizumab	Partial Response	DCB	18	18
P11	82	Male	Former smoker	60	Adenocarcinoma	IIIB	6.3	0	95	Pembrolizumab	Partial Response	DCB	17.57	17.57
P12	54	Male	Former smoker	45	Squamous carcinoma	IVA	1.5	1	90	Pembrolizumab	Stable Disease	DCB	20.83	20.83
P13	51	Female	Never smoker	0	Adenocarcinoma	IVA	3.6	2	70	Pembrolizumab	Stable Disease	DCB	8.27 ᶧ	10.07 ᶧ
P14	68	Male	Former smoker	42	Adenocarcinoma	IVB	9	2	90	Pembrolizumab	Progressive Disease	Non-DCB	3.27 ᶧ	5.63 ᶧ
P15	59	Female	Smoker	113	Adenocarcinoma	IVB	1.9	3	90	Pembrolizumab	Partial Response	DCB	15.2	15.2
P16	75	Male	Smoker	75	Squamous carcinoma	IIIA	4	0	60	Pembrolizumab	Stable Disease	DCB	11.57 ᶧ	16.07
P17	79	Male	Former smoker	50	Adenocarcinoma	IVB	4.6	4	70	Pembrolizumab	Stable Disease	DCB	14.3	14.3
P18	73	Male	Former smoker	110	Squamous carcinoma	IIIA	1.2	0	60	Pembrolizumab	Progressive Disease	Non-DCB	1.4 ᶧ	3.07 ᶧ
P19	71	Male	Smoker	54	Poorly differentiated	IIIC	11.2	0	70	Pembrolizumab	Stable Disease	DCB	10.6	10.6
P20	52	Male	Smoker	40	Adenocarcinoma	IVA	3.3	2	90	Pembrolizumab	Stable Disease	DCB	20.73	20.73
P21	69	Male	Smoker	52	Poorly differentiated	IVB	4.3	3	90	Pembrolizumab	Progressive Disease	Non-DCB	4.87 ᶧ	5 ᶧ
P22	57	Male	Smoker	29	Squamous carcinoma	IIIB	7.3	0	60	Pembrolizumab	Progressive Disease	Non-DCB	1.67 ᶧ	3.57 ᶧ
P23	87	Female	Former smoker	20	Large cell carcinoma	IIIB	6	0	80	Pembrolizumab	Progressive Disease	Non-DCB	1.4 ᶧ	6.5 ᶧ
P24	67	Female	Smoker	56	Adenocarcinoma	IVA	3.5	2	60	Pembrolizumab	Partial Response	DCB	12.93 ᶧ	19.87
P25	52	Male	Smoker	29	Adenocarcinoma	IVB	4.9	16	2	Pembrolizumab-Cisplatin-Pemetrexed	Partial Response	DCB	13.83	13.83
P26	75	Male	Smoker	12	Adenocarcinoma	IVB	9.7	4	0	Pembrolizumab-Cisplatin-Pemetrexed	Partial Response	DCB	12.13	12.13
P27	57	Male	Smoker	38	Adenocarcinoma	IVB	2.5	14	0	Pembrolizumab-Cisplatin-Pemetrexed	Progressive Disease	Non-DCB	2.83 ᶧ	3.8 ᶧ
P28	70	Male	Smoker	50	Poorly differentiated	IVB	5.1	4	0	Pembrolizumab-Cisplatin-Pemetrexed	Stable Disease	DCB	12.2	12.2
P29	53	Male	Smoker	105	Adenocarcinoma	IVA	8	1	0	Pembrolizumab-Cisplatin-Pemetrexed	Partial Response	DCB	8.57	8.57
P30	71	Female	Smoker	49	Adenocarcinoma	IVB	4.7	4	0	Pembrolizumab-Cisplatin-Pemetrexed	Partial Response	DCB	12 ᶧ	12.07 ᶧ
P31	46	Female	Smoker	15	Adenocarcinoma	IVA	5	4	0	Pembrolizumab-Cisplatin-Pemetrexed	Progressive Disease	Non-DCB	4.87 ᶧ	4.93 ᶧ
P32	66	Female	Smoker	60	Adenocarcinoma	IVA	5.4	1	10	Pembrolizumab-Cisplatin-Pemetrexed	Progressive Disease	Non-DCB	5.77 ᶧ	6.33 ᶧ
P33	52	Male	Smoker	36	Adenocarcinoma	IVB	6.6	8	10	Pembrolizumab-Cisplatin-Pemetrexed	Partial Response	DCB	8.33	8.33
a.TPS: Tumor Proportion Score.
ᶧ Progression or death during follow-up.

## Sheet: Table S2
Table S2. Sample characteristics and TCR-β CDR3 sequencing information of the patients included in the study.
Patient ID	Sample	RINa	No. of total productive readsb	Percent of total productive reads (%)	Read Length (base pairs)	Richness	Evenness	Convergence	Jaccard similarity index	No. of unique V	No. of unique J
P1	PREc	7.6	878602	79.0713	85	39511	0.816715	0.005485	0.04435	52	13
	FRd	9.9	730963	68.9561	82	25576	0.878294	0.003187		54	13
P2	PRE	10	1079345	81.9601	85	28465	0.867338	0.016383	0.1125	54	13
	FR	9.2	848343	67.4253	86	28640	0.817036	0.041727		52	13
P3	PRE	9.3	1002229	78.9712	84	28652	0.739564	0.013807	0.0815	54	13
	FR	8.6	965289	80.7994	84	27542	0.828778	0.009245		54	13
P4	PRE	8.7	1004648	79.7979	85	35072	0.95465	0.010067	0.05385	53	13
	FR	9.6	552776	57.5232	79	17238	0.923186	0.011393		53	13
P5	PRE	9.5	1035344	81.0398	85	33284	0.795553	0.012184	0.10184	54	13
	FR	9.5	1025175	79.7961	85	37288	0.835932	0.008732		54	13
P6	PRE	8.3	937836	80.4374	84	32937	0.762164	0.064493	0.07212	54	13
	FR	9.6	1173711	74.4029	84	41808	0.818851	0.041504		54	13
P7	PRE	9.2	1099995	81.5827	85	22544	0.712025	0.004807	0.08831	51	13
	FR	9.6	757567	64.6256	86	12140	0.673319	0.002915		52	13
P8	PRE	9.6	1569251	79.3227	85	24246	0.699279	0.219194	0.05922	53	13
	FR	7.7	1483191	79.2934	86	30786	0.824391	0.072642		54	13
P9	PRE	9.1	1316742	70.2369	82	18582	0.858173	0.004996	0.04678	53	13
	FR	8.7	1841565	81.0221	85	44582	0.838895	0.009456		53	13
P10	PRE	7	1283577	49.877	86	26728	0.85389	0.007749	0.10107	53	13
	FR	7.4	1224508	69.8586	86	34875	0.814356	0.004553		53	13
P11	PRE	9	1787971	80.4504	86	57036	0.916421	0.01009	0.10592	54	13
	FR	8.7	2320496	80.8287	86	66973	0.907609	0.009294		54	13
P12	PRE	8.6	1556304	82.3262	86	36809	0.951539	0.007418	0.04846	54	13
	FR	9	1775217	82.2985	86	30903	0.96159	0.003554		53	13
P13	PRE	9.6	1817359	80.0611	85	44776	0.956562	0.007798	0.04784	54	13
	FR	9.5	1767375	79.3024	85	23596	0.963778	0.005959		53	13
P14	PRE	9.3	1713053	82.5417	87	63816	0.821606	0.008116	0.04933	54	13
	FR	8.6	2076281	82.5763	86	47606	0.792567	0.00687		54	13
P15	PRE	9.1	1526508	79.4307	86	25723	0.942907	0.003009	0.0282	55	13
	FR	9.5	1694153	79.881	87	69067	0.921264	0.010142		55	13
P16	PRE	9.3	2254650	81.9417	85	20891	0.613616	0.009787	0.08841	54	13
	FR	10	1733040	83.4827	86	26722	0.576886	0.008531		53	13
P17	PRE	9.6	2427120	80.2557	87	38381	0.855517	0.019429	0.06047	54	13
	FR	9.8	2145744	81.4013	87	58561	0.811652	0.010115		54	13
P18	PRE	9.6	2359131	77.163	86	49062	0.758504	0.0232839	0.04114	52	13
	FR	9.6	1619188	78.0367	86	27370	0.800667	0.0132228		52	13
P19	PRE	7.7	2169993	84.3251	87	47770	0.943261	0.0122104	0.08602	53	13
	FR	8.9	1783798	74.9991	86	84373	0.943966	0.0141066		54	13
P20	PRE	7.9	1061101	66.9437	86	28337	0.755979	0.00824525	--	54	13
P21	PRE	9.4	1292306	83.0369	88	43699	0.826258	0.00902023	--	53	13
P22	PRE	9.7	1193124	83.2896	87	34404	0.694353	0.0958774	--	54	13
P23	PRE	9.4	991631	81.99	87	24979	0.817343	0.00393636	--	53	13
P24	PRE	7.2	1361759	75.6061	86	18629	0.914841	0.00486505	--	53	13
P25	PRE	9	872176	79.4948	87	29921	0.894773	0.0108961	--	53	13
P26	PRE	9.6	1318412	85.1722	88	40861	0.820758	0.00476573	--	52	13
P27	PRE	9.4	1316684	81.2203	88	44387	0.739443	0.00939122	--	53	13
P28	PRE	7.2	1147683	84.0391	88	30642	0.765986	0.0044925	--	54	13
P29	PRE	7.8	1941539	83.455	87	52145	0.725128	0.0107163	--	53	13
P30	PRE	8.8	1483527	63.0034	86	37828	0.860886	0.00529776	--	52	13
P31	PRE	8.2	1873990	85.8362	87	67686	0.946522	0.00945249	--	53	13
P32	PRE	9.3	613222	65.5453	92	15751	0.948035	0.00544269	--	53	13
P33	PRE	9.3	1623310	84.9902	86	24425	0.876932	0.0608263	--	54	13
a.RIN: RNA integrity number; b.Total productive reads: productive plus rescued reads; c.PRE: pretreatment; d.FR: first response assessment.

## Sheet: Table S3
Table S3. Comparison of TCR-β repertoire characteristics between PRE and FR samples.
Characteristics	Z	p-value
Number of total productive reads	-0.885	0.376
Richness	-0.443	0.658
Evenness	-0.241	0.809
Convergence	-1.61	0.107
PRE: pretreatment. FR: first response assessment.
Z and p-values were obtained using the Wilcoxon signed-rank test.

## Sheet: Table S4
Table S4. Correlation of basal TCR-β repertoire characteristics with clinicopathological variables in pretreated NSCLC patients.
Index	Clinicopathologic characteristics
	Age
	＜65	≥65	U	p-value
	median (range)	median (range)
Richness	31603 (24246-67686)	35072 (15751-63816)	132	0.885
Evenness	0.8353 (0.6944-0.9566)	0.8263 (0.6136-0.9546)	127	0.746
Convergence	0.0101 (0.0030-0.2192)	0.0081 (0.0039-0.0645)	94	0.13
	Smoking status
	Smoker	Non-smokera	U	p-value
	median (range)	median (range)
Richness	29921 (15751-67686)	41579 (24979-63816)	51	0.040 *
Evenness	0.8263 (0.6136-0.9546)	0.8386 (0.7585-0.9566)	78	0.355
Convergence	0.0094 (0.0030-0.2192)	0.0091 (0.0039-0.0645)	87	0.585
	Histology
	Adenocarcinoma	Non-adenocarcinomab	U	p-value
	median (range)	median (range)
Richness	31603 (15751-67868)	34404 (20891-49062)	98	0.686
Evenness	0.8568 (0.6993-0.9566)	0.7660 (0.6136-0.9515)	78	0.225
Convergence	0.0088 (0.0030-0.2192)	0.0098 (0.0039-0.0959)	93	0.544
	Stage
	III	IV	U	p-value
	median (range)	median (range)
Richness	41087 (20891-57036)	32937 (15715-67686)	65	0.455
Evenness	0.7879 (0.6136-0.9440)	0.8539 (0.6993-0.9566)	59	0.304
Convergence	0.0112 (0.0039-0.0959)	0.0082 (0.0030-0.2192)	55	0.225
	Tumor size
	≤5 cm	＞5 cm	U	p-value
	median (range)	median (range)
Richness	35072 (18582-67686)	31963 (15751-63816)	127	0.827
Evenness	0.8582 (0.6136-0.9566)	0.8191 (0.6944-0.9480)	102	0.259
Convergence	0.0094 (0.0030-0.0645)	0.0091 (0.0039-0.2192)	131	0.942
	Number of metastatic localizations
	≤2	＞2	U	p-value
	median (range)	median (range)
Richness	33844 (15751-63816)	30642 (18582-67686)	122	0.768
Evenness	0.8170 (0.6136-0.9566)	0.8555 (0.7120-0.9465)	117	0.632
Convergence	0.0101 (0.0039-0.2192)	0.0077 (0.0030-0.0608)	81	0.071
	PD-L1 TPSc
	＜50%	≥50%	U	p-value
	median (range)	median (range)
Richness	37828 (15751-67686)	33111 (18582-63816)	90	0.467
Evenness	0.8609 (0.7251-0.9480)	0.8239 (0.6136-0.9566)	97	0.657
Convergence	0.0094 (0.0045-0.0608)	0.0094 (0.0030-0.2192)	89	0.442
a. Non-smokers: never smokers + former smokers; b. Non-adenocarcinoma: Squamous carcinoma + Large cell carcinoma + Poorly differentiated carcinoma; c. TPS: Tumor Proportion Score.
U and p-values were obtained using the Mann-Whitney test. * p <0.05.

## Sheet: Table S5
Table S5. Correlation of TCR-β repertoire characteristics with response in NSCLC patients.
Variables	DCB	Non-DCB	U	p-value
	median (range)	median (range)
Richness PRE	30282 (18582 - 57036)	39511 (15751 - 67686)	88	0.208
Evenness PRE	0.8568 (0.6136 - 0.9566)	0.8173 (0.6944 - 0.9546)	105	0.541
Convergence PRE	0.0090 (0.0030 - 0.0645)	0.0094 (0.0039 - 0.2192)	108	0.62
Richness log10(FR/PRE)	0.0860 (-0.2782 - 0.4298)	-0.1871 (-0.3098 - 0.1038)	13.5	0.046 *
Evenness log10(FR/PRE)	-0.0066 (-0.0269 - 0.0492)	0.0235 (-0.0177 - 0.0719)	21	0.195
Convergence log10 (FR/PRE)	-0.1297 (-0.3188 - 0.5276)	-0.2366 (-0.4815 - 0.0531)	22	0.229
Jaccard similarity index	0.0838 (0.0282 - 0.1125)	0.0493 (0.0411 - 0.0592)	14	0.052
TRBV6-5 PRE	0.0232 (0.0126 - 0.0881)	0.0274 (0.0216 - 0.2261)	56	0.013 *
TRBV20-1 PRE	0.1000 (0.0599 - 0.1717)	0.0762 (0.0625 - 0.1339)	63	0.027 *
TRBV23-1 PRE	0.0071 (0.0043 - 0.0306)	0.0055 (0.0033 - 0.0113)	68	0.043 *
TRBJ1-2 PRE	0.1085 (0.0339 - 0.1945)	0.1373 (0.0767 - 0.2931)	69	0.047 *
TRBJ2-4 PRE	0.0174 (0.0057 - 0.0767)	0.0109 (0.0070 - 0.0261)	65	0.032 *
TRBV6-4 FR	0.0013 (0.0007 - 0.0061)	0.0044 (0.0014 - 0.0113)	12	0.033 *
TRBV6-5 FR	0.0243 (0.0112 - 0.0321)	0.0331 (0.0248 - 0.0477)	7	0.010 *
TRBV11-1 FR	0.0030 (0.0011 - 0.0153)	0.0021 (0.0000 - 0.0028)	12	0.033 *
DCB: durable clinical benefit.PRE: pretreatment. FR: first response assessment.
U and p-values were obtained using the Mann-Whitney test. * p <0.05.
